# Supplementary material
Source: PubMed Central journal article supplement (PMC3010843)
Supplement: mmc1.pdf [file mmc1.pdf]

Biophysical Journal, Volume 100

Supporting Material

**Dissociation of Bimolecular  $\alpha$ IIb $\beta$ 3-Fibrinogen Complex under a Constant Tensile Force**

Rustem I. Litvinov, Valeri Barsegov, Andrew J. Schissler, Andrew R. Fisher, Joel S. Bennett, John W. Weisel, and Henry Shuman

**Biophysical Journal, volume 99**  
**Supplementary material**  
to the paper by Litvinov et al. “Dissociation of Bimolecular  $\alpha$ IIb $\beta$ 3-Fibrinogen  
Complex under a Constant Tensile Force”

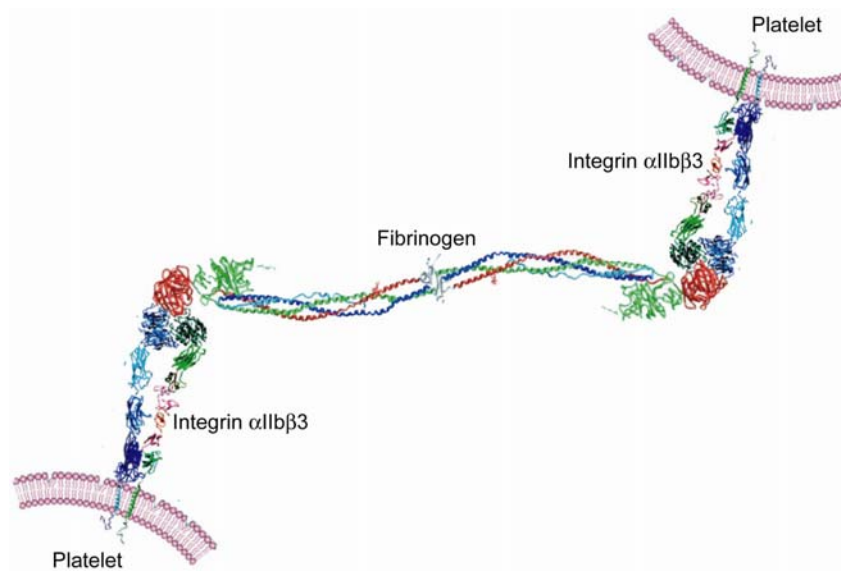

Figure S1. Cartoon of the integrin-fibrinogen interactions based on their crystal structures.

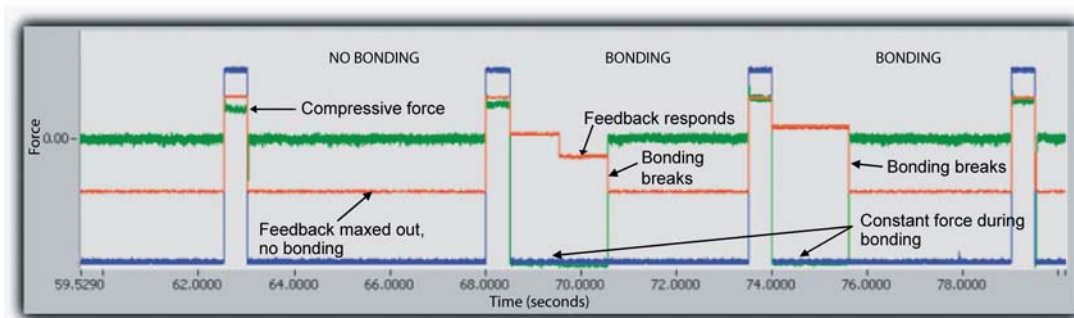

Figure S2. Data trace of  $\alpha$ IIb $\beta$ 3-fibrinogen interactions under a constant tensile force. The lines represent an actual force (green), a command signal (blue), and a feedback output (red). Pictured above are two separate bonding events, each with lifetimes of approximately 2 seconds. Notice how the feedback enables the system to maintain a constant force (green) during bonding.

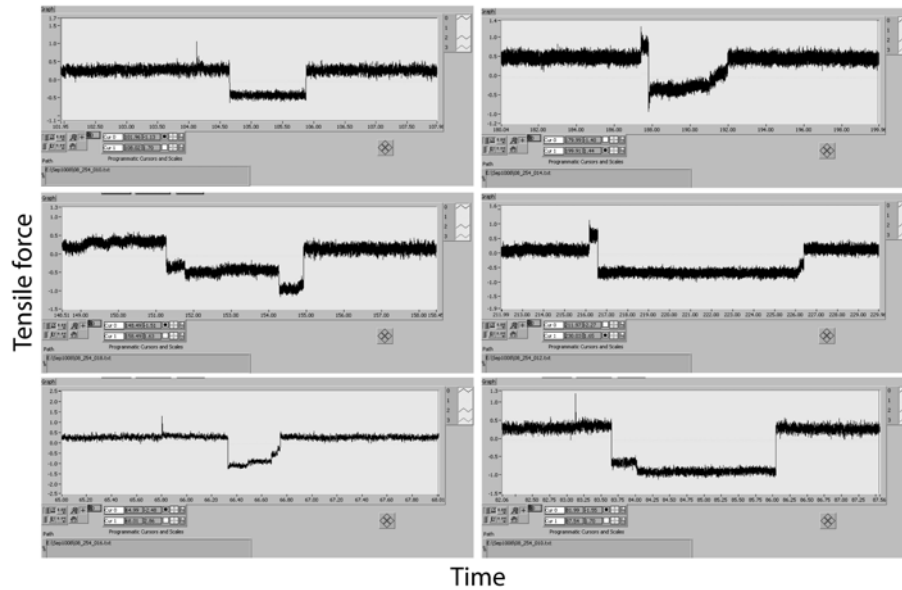

Figure S3. Different unbinding scenarios without tensile force clamp.

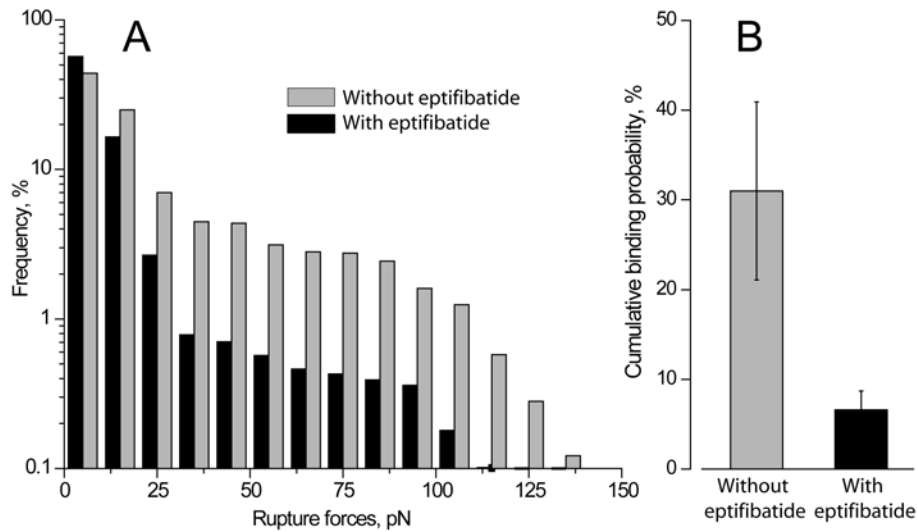

Figure S4. Testing the binding activity and specificity of the  $\alpha$ IIb $\beta$ 3 and fibrinogen preparations. (A) Rupture force spectra of the  $\alpha$ IIb $\beta$ 3-fibrinogen interactions in the absence and presence of 100  $\mu$ g/ml eptifibatide, a specific  $\alpha$ IIb $\beta$ 3 antagonist. (B) Comparison of the cumulative binding probability for the  $\alpha$ IIb $\beta$ 3-fibrinogen interactions (forces >20 pN) derived from the histograms displayed in panel A.

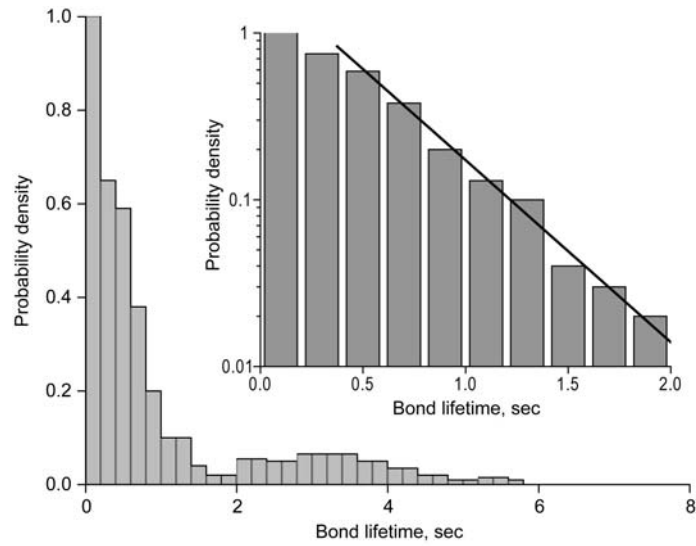

Figure S5. Histogram of bond lifetimes for the  $\alpha\text{IIb}\beta\text{3}$ -fibrinogen interactions measured under a constant tensile force. Inset – semi-logarithmic plot of the probability density distribution for the short interactions ( $<2\text{s}$ ), showing the exponential function  $p_u(t) = k_u \exp[-k_u t]$  to fit this portion of the histograms.

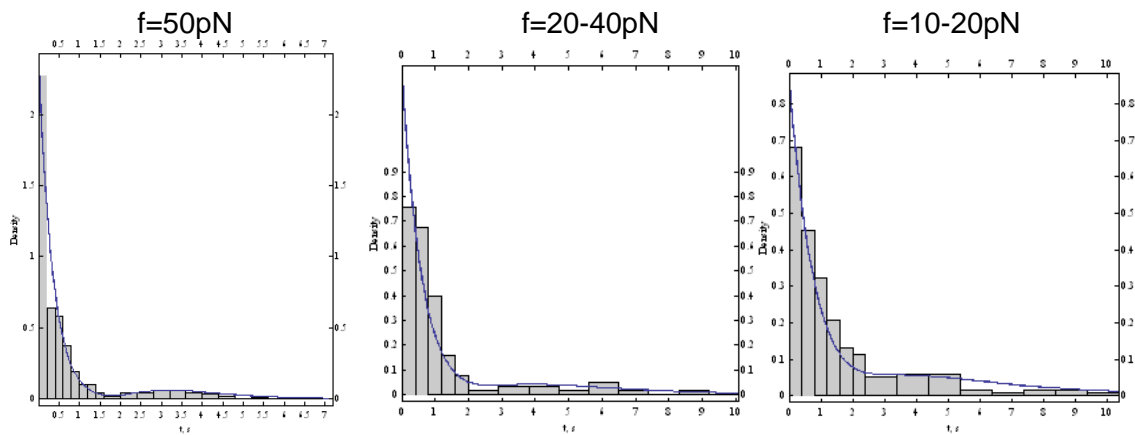

Figure S6. Histograms of bond lifetimes (bars) and fitting curves (solid line) obtained at different tensile forces.

Table S1

Control for non-specific interactions performed with various surface pairs other than integrin-fibrinogen

| <i>Interacting surfaces</i> | <i>n</i> | <i>Binding frequency</i> | <i>Bond lifetime range, s</i> |
|-----------------------------|----------|--------------------------|-------------------------------|
| Plain-Plain                 | 612      | 1.9%                     | 0.008-0.061                   |
| Integrin-Ethanolamine       | 498      | 2.0%                     | 0.008-0.093                   |
| Integrin-BSA                | 549      | 2.2%                     | 0.008-0.480                   |
| BSA-Ethanolamine            | 621      | 0.9%                     | 0.008-0.624                   |
| BSA-BSA                     | 612      | 5.3%                     | 0.008-0.371                   |
| BSA-Fibrinogen              | 622      | 1.3%                     | 0.008-0.341                   |
| Ethanolamine-Ethanolamine   | 940      | 0.3%                     | 0.008-0.038                   |
| Ethanolamine-BSA            | 531      | 1.1%                     | 0.085-0.680                   |
| Ethanolamine-Fibrinogen     | 625      | 1.8%                     | 0.011-0.554                   |

*Notes.*

1. Characterization of the interacting control surfaces:

- non-activated uncoated silica pedestals against non-activated uncoated latex beads (plain-plain);
- glutaraldehyde-activated integrin-coated pedestals against EDAC-activated ethanolamine-coated beads (integrin-ethanolamine);
- glutaraldehyde-activated integrin-coated pedestals against EDAC-activated BSA-coated beads (integrin-BSA);
- glutaraldehyde-activated BSA-coated pedestals against EDAC-activated ethanolamine-coated beads (BSA-ethanolamine);
- glutaraldehyde-activated BSA-coated pedestals against EDAC-activated BSA-coated beads (BSA-BSA);
- glutaraldehyde-activated BSA-coated pedestals against EDAC-activated fibrinogen-coated beads (BSA-fibrinogen);
- glutaraldehyde-activated ethanolamine-coated pedestals against EDAC-activated ethanolamine-coated beads (ethanolamine- ethanolamine);
- glutaraldehyde-activated ethanolamine-coated pedestals against EDAC-activated BSA-coated beads (ethanolamine-BSA);
- glutaraldehyde-activated ethanolamine-coated pedestals against EDAC-activated fibrinogen-coated beads (ethanolamine-fibrinogen).

2. We also performed control inhibitory experiments in the presence of fibrinogen or  $\alpha$ IIB $\beta$ 3 in solution, but the results were not included in the paper for the following reasons. When free fibrinogen or  $\alpha$ IIB $\beta$ 3 were inserted into a chamber at nM to mM concentrations, the fibrinogen- and  $\alpha$ IIB $\beta$ 3-coated surfaces became even more reactive and stickier and displayed a complex multimodal bond lifetime distribution. It was impossible to discriminate between integrin-fibrinogen interactions, on the one hand, and fibrinogen-fibrinogen or  $\alpha$ IIB $\beta$ 3- $\alpha$ IIB $\beta$ 3 interactions, on the other hand. Therefore, these traditional competitive inhibition experiments did not seem to work for fibrinogen and  $\alpha$ IIB $\beta$ 3 because of the large size of the molecules and their tendencies to oligomerize and adhere to artificial surfaces.
